# Supplementary material
Source: MDPI journal article supplement (https://www.mdpi.com/2414-4088/6/1/3)
Supplement: s1 [file s1]

# Baseline

| m(2,3)-m(1,2)                                                                                                                                                                                                                                                                                                                                                                                                                                                                                                                                                                                                                                                                                                                                                                                                                                                                                                                                                                                                                                                                                                                                                                                                       | m(3,4)-m(2,3)                                                                                                                                                                                                                                                                                                                                                                                                                                                                                                                                                                                                                                                                                                                                                                                                                                                                                                                                                                                                                                                                                                                                                                                                                                                 |
|---------------------------------------------------------------------------------------------------------------------------------------------------------------------------------------------------------------------------------------------------------------------------------------------------------------------------------------------------------------------------------------------------------------------------------------------------------------------------------------------------------------------------------------------------------------------------------------------------------------------------------------------------------------------------------------------------------------------------------------------------------------------------------------------------------------------------------------------------------------------------------------------------------------------------------------------------------------------------------------------------------------------------------------------------------------------------------------------------------------------------------------------------------------------------------------------------------------------|---------------------------------------------------------------------------------------------------------------------------------------------------------------------------------------------------------------------------------------------------------------------------------------------------------------------------------------------------------------------------------------------------------------------------------------------------------------------------------------------------------------------------------------------------------------------------------------------------------------------------------------------------------------------------------------------------------------------------------------------------------------------------------------------------------------------------------------------------------------------------------------------------------------------------------------------------------------------------------------------------------------------------------------------------------------------------------------------------------------------------------------------------------------------------------------------------------------------------------------------------------------|
| <p>TOST results:</p> <p>t-value lower bound: 8.68</p> <p>p-value lower bound: 0.0000001      <b>Bonferroni: &lt;.001</b></p> <p>t-value upper bound: -8.22</p> <p>p-value upper bound: 0.0000002      <b>Bonferroni: &lt;.001</b></p> <p>degrees of freedom : 16</p> <p>Equivalence bounds (raw scores):</p> <p>low eqbound: -5</p> <p>high eqbound: 5</p> <p>TOST confidence interval:</p> <p>lower bound 90% CI: -0.9</p> <p>upper bound 90% CI: 1.167</p> <p>NHST confidence interval:</p> <p>lower bound 95% CI: -1.121</p> <p>upper bound 95% CI: 1.388</p> <p>Equivalence Test Result:</p> <p>The <b>equivalence test was significant</b>, <math>t(16) = -8.224</math>, <math>p = 0.000000193</math>, given equivalence bounds of -5.000 and 5.000 (on a raw scale) and an alpha of 0.05.</p> <p>Null Hypothesis Test Result:</p> <p>The <b>null hypothesis test was non-significant</b>, <math>t(16) = 0.226</math>, <math>p = 0.824</math>, given an alpha of 0.05.</p> <p><b>Bonferroni: 1.000</b></p> <p>Based on the equivalence test and the null-hypothesis test combined, we can conclude that the observed effect is statistically not different from zero and statistically equivalent to zero.</p> | <p>TOST results:</p> <p>t-value lower bound: 40.38</p> <p>p-value lower bound: 0.000000000000000008      <b>Bonferroni: &lt;.001</b></p> <p>t-value upper bound: -58.04</p> <p>p-value upper bound: 0.0000000000000000002      <b>Bonferroni: &lt;.001</b></p> <p>degrees of freedom : 16</p> <p>Equivalence bounds (raw scores):</p> <p>low eqbound: -5</p> <p>high eqbound: 5</p> <p>TOST confidence interval:</p> <p>lower bound 90% CI: -1.074</p> <p>upper bound 90% CI: -0.72</p> <p>NHST confidence interval:</p> <p>lower bound 95% CI: -1.112</p> <p>upper bound 95% CI: -0.682</p> <p>Equivalence Test Result:</p> <p>The <b>equivalence test was significant</b>, <math>t(16) = 40.381</math>, <math>p = 0.00000000000000000784</math>, given equivalence bounds of -5.000 and 5.000 (on a raw scale) and an alpha of 0.05.</p> <p>Null Hypothesis Test Result:</p> <p>The <b>null hypothesis test was significant</b>, <math>t(16) = -8.829</math>, <math>p = 0.0000000151</math>, given an alpha of 0.05.</p> <p><b>Bonferroni: &lt;.001</b></p> <p>Based on the equivalence test and the null-hypothesis test combined, we can conclude that the observed effect is statistically different from zero and statistically equivalent to zero.</p> |

| m(2,3)-m(1,2)                                                                                                                                                                                                                                                                                                                                                                                                                                                                                                                                                                                                                                                                                                                                                                                                                                                                                                                                                                                                                                                                                                                                                                                  | m(3,4)-m(2,3)                                                                                                                                                                                                                                                                                                                                                                                                                                                                                                                                                                                                                                                                                                                                                                                                                                                                                                                                                                                                                                                                                                                                                                       |
|------------------------------------------------------------------------------------------------------------------------------------------------------------------------------------------------------------------------------------------------------------------------------------------------------------------------------------------------------------------------------------------------------------------------------------------------------------------------------------------------------------------------------------------------------------------------------------------------------------------------------------------------------------------------------------------------------------------------------------------------------------------------------------------------------------------------------------------------------------------------------------------------------------------------------------------------------------------------------------------------------------------------------------------------------------------------------------------------------------------------------------------------------------------------------------------------|-------------------------------------------------------------------------------------------------------------------------------------------------------------------------------------------------------------------------------------------------------------------------------------------------------------------------------------------------------------------------------------------------------------------------------------------------------------------------------------------------------------------------------------------------------------------------------------------------------------------------------------------------------------------------------------------------------------------------------------------------------------------------------------------------------------------------------------------------------------------------------------------------------------------------------------------------------------------------------------------------------------------------------------------------------------------------------------------------------------------------------------------------------------------------------------|
| <p>TOST results:</p> <p>t-value lower bound: 8.58<br/> p-value lower bound: 0.0000001      <b>Bonferroni: &lt;.001</b><br/> t-value upper bound: -11.36<br/> p-value upper bound: 0.000000002      <b>Bonferroni: &lt;.001</b><br/> degrees of freedom : 16</p> <p>Equivalence bounds (raw scores):<br/> low eqbound: -5<br/> high eqbound: 5</p> <p>TOST confidence interval:<br/> lower bound 90% CI: -1.573<br/> upper bound 90% CI: 0.178</p> <p>NHST confidence interval:<br/> lower bound 95% CI: -1.761<br/> upper bound 95% CI: 0.365</p> <p>Equivalence Test Result:<br/> The <b>equivalence test was significant</b>, <math>t(16) = 8.578</math>, <math>p = 0.000000111</math>, given equivalence bounds of -5.000 and 5.000 (on a raw scale) and an alpha of 0.05.</p> <p>Null Hypothesis Test Result:<br/> The <b>null hypothesis test was non-significant</b>, <math>t(16) = -1.391</math>, <math>p = 0.183</math>, given an alpha of 0.05.<br/> <b>Bonferroni: 0.549</b></p> <p>Based on the equivalence test and the null-hypothesis test combined, we can conclude that the observed effect is statistically not different from zero and statistically equivalent to zero.</p> | <p>TOST results:</p> <p>t-value lower bound: 4.04<br/> p-value lower bound: 0.0005      <b>Bonferroni: &lt;.001</b><br/> t-value upper bound: -5.29<br/> p-value upper bound: 0.00004      <b>Bonferroni: &lt;.001</b><br/> degrees of freedom : 16</p> <p>Equivalence bounds (raw scores):<br/> low eqbound: -5<br/> high eqbound: 5</p> <p>TOST confidence interval:<br/> lower bound 90% CI: -2.538<br/> upper bound 90% CI: 1.205</p> <p>NHST confidence interval:<br/> lower bound 95% CI: -2.939<br/> upper bound 95% CI: 1.606</p> <p>Equivalence Test Result:<br/> The <b>equivalence test was significant</b>, <math>t(16) = 4.043</math>, <math>p = 0.000471</math>, given equivalence bounds of -5.000 and 5.000 (on a raw scale) and an alpha of 0.05.</p> <p>Null Hypothesis Test Result:<br/> The <b>null hypothesis test was non-significant</b>, <math>t(16) = -0.622</math>, <math>p = 0.543</math>, given an alpha of 0.05.<br/> <b>Bonferroni: 1.000</b></p> <p>Based on the equivalence test and the null-hypothesis test combined, we can conclude that the observed effect is statistically not different from zero and statistically equivalent to zero.</p> |

| m(2,3)-m(1,2)                                                                                                                                                                                                                                                                                                                                                                                                                                                                                                                                                                                                                                                                                                                                                                                                                                                                                                                                                                                                                                                                                                                                                    | m(3,4)-m(2,3)                                                                                                                                                                                                                                                                                                                                                                                                                                                                                                                                                                                                                                                                                                                                                                                                                                                                                                                                                                                                                                                                                                                                                              |
|------------------------------------------------------------------------------------------------------------------------------------------------------------------------------------------------------------------------------------------------------------------------------------------------------------------------------------------------------------------------------------------------------------------------------------------------------------------------------------------------------------------------------------------------------------------------------------------------------------------------------------------------------------------------------------------------------------------------------------------------------------------------------------------------------------------------------------------------------------------------------------------------------------------------------------------------------------------------------------------------------------------------------------------------------------------------------------------------------------------------------------------------------------------|----------------------------------------------------------------------------------------------------------------------------------------------------------------------------------------------------------------------------------------------------------------------------------------------------------------------------------------------------------------------------------------------------------------------------------------------------------------------------------------------------------------------------------------------------------------------------------------------------------------------------------------------------------------------------------------------------------------------------------------------------------------------------------------------------------------------------------------------------------------------------------------------------------------------------------------------------------------------------------------------------------------------------------------------------------------------------------------------------------------------------------------------------------------------------|
| <p>TOST results:<br/> t-value lower bound: 1.24<br/> p-value lower bound: 0.117 <b>Bonferroni: .351</b><br/> t-value upper bound: -3.12<br/> p-value upper bound: 0.003 <b>Bonferroni: .009</b><br/> degrees of freedom : 16</p> <p>Equivalence bounds (raw scores):<br/> low eqbound: -5<br/> high eqbound: 5</p> <p>TOST confidence interval:<br/> lower bound 90% CI: -6.165<br/> upper bound 90% CI: 1.84</p> <p>NHST confidence interval:<br/> lower bound 95% CI: -7.022<br/> upper bound 95% CI: 2.697</p> <p>Equivalence Test Result:<br/> The <b>equivalence test was non-significant</b>, <math>t(16) = 1.238</math>, <math>p = 0.117</math>, given equivalence bounds of -5.000 and 5.000 (on a raw scale) and an alpha of 0.05.</p> <p>Null Hypothesis Test Result:<br/> The <b>null hypothesis test was non-significant</b>, <math>t(16) = -0.943</math>, <math>p = 0.360</math>, given an alpha of 0.05.<br/> <b>Bonferroni: 1.000</b></p> <p>Based on the equivalence test and the null-hypothesis test combined, we can conclude that the observed effect is statistically not different from zero and statistically not equivalent to zero.</p> | <p>TOST results:<br/> t-value lower bound: 6.33<br/> p-value lower bound: 0.000005 <b>Bonferroni: &lt;.001</b><br/> t-value upper bound: -5.73<br/> p-value upper bound: 0.00002 <b>Bonferroni: &lt;.001</b><br/> degrees of freedom : 16</p> <p>Equivalence bounds (raw scores):<br/> low eqbound: -5<br/> high eqbound: 5</p> <p>TOST confidence interval:<br/> lower bound 90% CI: -1.198<br/> upper bound 90% CI: 1.697</p> <p>NHST confidence interval:<br/> lower bound 95% CI: -1.508<br/> upper bound 95% CI: 2.007</p> <p>Equivalence Test Result:<br/> The <b>equivalence test was significant</b>, <math>t(16) = -5.731</math>, <math>p = 0.0000155</math>, given equivalence bounds of -5.000 and 5.000 (on a raw scale) and an alpha of 0.05.</p> <p>Null Hypothesis Test Result:<br/> The <b>null hypothesis test was non-significant</b>, <math>t(16) = 0.301</math>, <math>p = 0.767</math>, given an alpha of 0.05.<br/> <b>Bonferroni: 1.000</b></p> <p>Based on the equivalence test and the null-hypothesis test combined, we can conclude that the observed effect is statistically not different from zero and statistically equivalent to zero.</p> |

V+VM

| m(2,3)-m(1,2)                                                                                                                                                                                                                                                                                                                                                                                                                                                                                                                                                                                                                                                                                                                                                                                                                                                                                                                                                                                                                                                                                                                                         | m(3,4)-m(2,3)                                                                                                                                                                                                                                                                                                                                                                                                                                                                                                                                                                                                                                                                                                                                                                                                                                                                                                                                                                                                                                                                                                                                      |
|-------------------------------------------------------------------------------------------------------------------------------------------------------------------------------------------------------------------------------------------------------------------------------------------------------------------------------------------------------------------------------------------------------------------------------------------------------------------------------------------------------------------------------------------------------------------------------------------------------------------------------------------------------------------------------------------------------------------------------------------------------------------------------------------------------------------------------------------------------------------------------------------------------------------------------------------------------------------------------------------------------------------------------------------------------------------------------------------------------------------------------------------------------|----------------------------------------------------------------------------------------------------------------------------------------------------------------------------------------------------------------------------------------------------------------------------------------------------------------------------------------------------------------------------------------------------------------------------------------------------------------------------------------------------------------------------------------------------------------------------------------------------------------------------------------------------------------------------------------------------------------------------------------------------------------------------------------------------------------------------------------------------------------------------------------------------------------------------------------------------------------------------------------------------------------------------------------------------------------------------------------------------------------------------------------------------|
| <p>TOST results:<br/> t-value lower bound: 5.33<br/> p-value lower bound: 0.00003      <b>Bonferroni: &lt;.001</b><br/> t-value upper bound: -7.02<br/> p-value upper bound: 0.000001      <b>Bonferroni: &lt;.001</b><br/> degrees of freedom : 16</p> <p>Equivalence bounds (raw scores):<br/> low eqbound: -5<br/> high eqbound: 5</p> <p>TOST confidence interval:<br/> lower bound 90% CI: -2.096<br/> upper bound 90% CI: 0.73</p> <p>NHST confidence interval:<br/> lower bound 95% CI: -2.399<br/> upper bound 95% CI: 1.033</p> <p>Equivalence Test Result:<br/> The <b>equivalence test was significant</b>, <math>t(16) = 5.333</math>, <math>p = 0.0000337</math>, given equivalence bounds of -5.000 and 5.000 (on a raw scale) and an alpha of 0.05.</p> <p>Null Hypothesis Test Result:<br/> The <b>null hypothesis test was non-significant</b>, <math>t(16) = -0.844</math>, <math>p = 0.411</math>, given an alpha of 0.05.</p> <p>Based on the equivalence test and the null-hypothesis test combined, we can conclude that the observed effect is statistically not different from zero and statistically equivalent to zero.</p> | <p>TOST results:<br/> t-value lower bound: 4.79<br/> p-value lower bound: 0.0001      <b>Bonferroni: &lt;.001</b><br/> t-value upper bound: -4.76<br/> p-value upper bound: 0.0001      <b>Bonferroni: &lt;.001</b><br/> degrees of freedom : 16</p> <p>Equivalence bounds (raw scores):<br/> low eqbound: -5<br/> high eqbound: 5</p> <p>TOST confidence interval:<br/> lower bound 90% CI: -1.811<br/> upper bound 90% CI: 1.845</p> <p>NHST confidence interval:<br/> lower bound 95% CI: -2.203<br/> upper bound 95% CI: 2.236</p> <p>Equivalence Test Result:<br/> The <b>equivalence test was significant</b>, <math>t(16) = -4.760</math>, <math>p = 0.000107</math>, given equivalence bounds of -5.000 and 5.000 (on a raw scale) and an alpha of 0.05.</p> <p>Null Hypothesis Test Result:<br/> The <b>null hypothesis test was non-significant</b>, <math>t(16) = 0.016</math>, <math>p = 0.987</math>, given an alpha of 0.05.</p> <p>Based on the equivalence test and the null-hypothesis test combined, we can conclude that the observed effect is statistically not different from zero and statistically equivalent to zero.</p> |
